# Supplementary material for: A modelling approach for exploring muscle dynamics during cyclic contractions
Source: PLoS Comput Biol. 2018 Apr 16;14(4):e1006123. doi: 10.1371/journal.pcbi.1006123 (PMC5919698; doi:10.1371/journal.pcbi.1006123)
Supplement: S4 Table — (XLSX) [file pcbi.1006123.s004.xlsx]

## Sheet: Sheet1
Point number	l̂m	F̂P
1	0.7	0
2	1.40737	0
3	1.29739	0.248418
4	1.65	1.1
